# COVID-19 pandemic and lockdown measures impact on mental health among the general population in Italy. An N=18147 web-based survey.

Rodolfo Rossi<sup>1</sup>, Valentina Socci<sup>2\*</sup>, Dalila Talevi<sup>2</sup>, Sonia Mensi<sup>3</sup>, Cinzia Niolu<sup>1,4</sup>, Francesca Pacitti<sup>2</sup>, Antiniscia Di Marco<sup>5</sup>, Alessandro Rossi<sup>2</sup>, Alberto Siracusano<sup>1,4</sup>, Giorgio Di Lorenzo<sup>1,4,6</sup>.

<sup>1</sup>Chair of Psychiatry, Department of Systems Medicine, University of Rome Tor Vergata, Rome, Italy

<sup>2</sup>Department of Biotechnological and Applied Clinical Sciences, University of L'Aquila, L'Aquila, Italy

<sup>3</sup>Department of Anesthesiology, Intensive Care and Emergency Medicine, Fondazione Policlinico Universitario A. Gemelli IRCCS, Rome, Italy

<sup>4</sup>Psychiatry and Clinical Psychology Unit, Fondazione Policlinico Tor Vergata, Rome, Italy

<sup>5</sup>Department of Information Engineering, Computer Science and Mathematics, University of L'Aquila, L'Aquila, Italy

<sup>6</sup>IRCCS Fondazione Santa Lucia, Rome, Italy.

\*Correspondence:  
Valentina Socci  
[valentinasocci@gmail.com](mailto:valentinasocci@gmail.com)

## Abstract

### Background

The psychological impact of the COroNaVirus Disease 2019 (COVID-19) outbreak and lockdown measures on the Italian population are unknown.

The current study assesses rates of mental health outcomes in the Italian general population three to four weeks into lockdown measures and explores the impact of COVID-19 related potential risk factors.

### Methods

A web-based survey spread throughout the internet between March 27<sup>th</sup> and April 6<sup>th</sup> 2020. 18147 individuals completed the questionnaire, 79.6% women.

Selected outcomes were post-traumatic stress symptoms (PTSS), depression, anxiety, insomnia, perceived stress and adjustment disorder symptoms (ADS). Seemingly unrelated logistic regression analysis was performed to identify COVID-19 related risk factors.

### Results

37 Respondents endorsing PTSS, depression, anxiety, insomnia, high perceived stress and adjustment  
38 disorder were 6604 (37%), 3084 (17.3%), 3700 (20.8%), 1301 (7.3%), 3895 (21.8%) and 4092  
39 (22.9%), respectively. Being woman and younger age were associated with all of the selected  
40 outcomes. Quarantine was associated with PTSS, anxiety and ADS. Any recent COVID-related  
41 stressful life event was associated with all the selected outcomes. Discontinued working activity  
42 due to the COVID-19 was associated with all the selected outcomes, except for ADS; working  
43 more than usual was associated with PTSS, Perceived stress and ADS. Having a loved one  
44 deceased by COVID-19 was associated with PTSS, depression, perceived stress and insomnia.

#### 45 **Conclusion**

46 We found high rates of negative mental health outcomes in the Italian general population three  
47 weeks into the COVID-19 lockdown measures and different COVID-19 related risk factors. These  
48 findings warrant further monitoring on the Italian population's mental health.

49

## 50 **Background**

51 The psychological impact of the COroNaVirus Disease 2019 (COVID-19) outbreak and related  
52 lockdown measures among the Italian population are unknown. The COVID-19 pandemic is a  
53 global health emergency that could potentially have a serious impact on public health, including  
54 mental health (World Health Organization, 2020a; Xiang et al., 2020). Since clusters of atypical  
55 pneumonia of unknown etiology were discovered in the city of Whuan, Hubei province, in late  
56 December 2019, the viral disease has continued to exponentially spread throughout China and  
57 worldwide. Italy has been the first European country that had to face the pandemic. On March 9<sup>th</sup>  
58 2020, lockdown measures were enforced by the government on entire national territory.  
59 Lockdown measures included travel restrictions, the mandatory closure of schools, nonessential  
60 commercial activities and industries. People were asked to stay at home and socially isolate  
61 themselves to prevent being infected.

62 As previously reported, health emergencies such as epidemic can lead to detrimental and long-  
63 lasting psychosocial consequences, due to disease related fear and anxiety, large-scale social  
64 isolation, and the overabundance of (mis)information on social media and elsewhere (Dong and  
65 Bouey, 2020). At the individual level, epidemics are associated with a wide range of psychiatric  
66 comorbidities including anxiety, panic, depression and trauma-related disorders (Tucci et al.,  
67 2017). The psychosocial impact of health emergencies seems to be even higher during quarantine  
68 measures (Brooks et al., 2020). Quarantine has been associated with high stress levels  
69 (DiGiovanni et al., 2004), depression (Hawryluck et al., 2004), irritability and insomnia (Lee et  
70 al., 2005). Furthermore, being quarantined is associated with acute stress (Bai et al., 2004) and  
71 trauma-related (Wu et al., 2009) disorders, particularly in specific at-risk populations such as  
72 health workers (Lai et al., 2020).

73 Concerning the COVID-19 pandemic, a study on 1210 respondents in China found rates of 30%  
74 of anxiety and 17% of depression (Wang et al., 2020). Further, in a nationwide survey including  
75 more than 50.000 Chinese respondents, almost 35% of the participants reported trauma-related  
76 distress symptoms, with women and young adults showing significantly higher psychological  
77 distress (Qiu et al., 2020).

78 Together, these findings strongly suggest the need to accurately and timely assess the magnitude  
79 of mental health outcomes in the general population exposed to COVID-19 pandemic, with  
80 particular regard to the implementation of preventive and early interventions strategies for those at  
81 higher risk. However, no study to date has investigated mental health outcomes and associated  
82 risk factors in the Italian population. This could be of additional relevance considering the  
83 implementation of the strict lockdown and social distancing measures imposed on the entire  
84 national territory.

85 The aim of the current study was to assess rates of mental health outcomes in the Italian general  
86 population three to four weeks into lockdown measures and to explore the impact of COVID-19  
87 related potential risk factors. This study aims at providing evidence that could potentially inform  
88 subsequent research strategies and mental health delivery in Italy and Europe.

89

## 90 **Methods**

### 91 *Study Design*

92 A cross-sectional web-based survey design was adopted. Approval for this study was obtained  
93 from the local IRB at University of L'Aquila. On-line consent was obtained from the participants.

94 Participants were allowed to terminate the survey at any time they desired. The survey was  
95 anonymous, and confidentiality of information was assured.

96 Data on mental health were collected between March 27<sup>th</sup> and April 6<sup>th</sup> 2020 using an on-line  
97 questionnaire spread throughout the internet, using sponsored social network advertisement  
98 together with a snowball recruiting technique. The investigated timeframe corresponds to the  
99 contagion peak in Italy, according to epidemiological data confirmed by the World Health  
100 Organization (World Health Organization, 2020). The survey was developed using the free  
101 software Google Forms<sup>®</sup>.

102

### 103 *Participants*

104 All Italian citizens  $\geq 18$  years were eligible. A total of 18147 individuals completed the  
105 questionnaire, of which 14447 (79.6%) women, median age was 38 (IQR=23). Because of the  
106 web-based design, no response rate could be estimated as it was not possible to estimate how  
107 many persons were reached by social network advertisement.

108

### 109 *Mental health outcomes*

110 Post-Traumatic Stress Symptoms (PTSS), depression, anxiety, insomnia, perceived stress and  
111 adjustment disorder symptoms (ADS) were assessed using the Italian versions of the following  
112 instruments and cut-offs or scoring:

- 113 • the Global Psychotrauma Screen, post-traumatic stress symptoms subscale (GPS-PTSS)  
114 (Olf et al. *in press*): PTSS were considered of clinical relevance if more than 3 out of five  
115 5 symptoms were reported as present;
- 116 • the 9-item Patient Health Questionnaire (PHQ-9) (Spitzer et al., 1999), using the cut-off  
117 for severe depression at  $\geq 15$ ;
- 118 • the 7-item Generalized Anxiety Disorder scale (GAD-7) (Spitzer et al., 2006), using the  
119 cut-off for severe anxiety at  $\geq 15$ ;
- 120 • the 7-item Insomnia Severity Index (ISI) (Morin et al., 2011), using the cut-off at  $\geq 22$  for  
121 severe insomnia;
- 122 • the 10-item Perceived Stress Scale (PSS) (Cohen and Hoberman, 1983), using a quartile  
123 split to separate the higher quartile from the remaining participants;
- 124 • the International Adjustment Disorder Questionnaire (IADQ) (Shevlin et al., 2020), using  
125 the standard scoring system. IADQ comprises a brief checklist of potentially stressful  
126 events, such as financial, work, health or housing problems. The IADQ checklist was  
127 modified in order to ascertain if the reported problem was due to COVID-19. ADS were  
128 rated as present if a stressful life event correlated to COVID-19 was present, together with  
129 preoccupation and failure to adapt symptoms and a relevant impact on global functioning.

130

### 131 *Independent variables*

132 Standardized age, gender and region of residence (Northern Italy: Aosta Valley, Piedmont,  
133 Liguria, Lombardy, Trentino-Alto Adige, Veneto, Friuli-Venezia Giulia, Emilia-Romagna;  
134 Central Italy: Tuscany, Umbria, Marche, Lazio; Southern Italy: Abruzzo, Molise, Apulia,  
135 Campania, Basilicata, Calabria, Sicily and Sardinia) were inserted as independent variables.

136 Region of residence was inserted in order to account for the different incidence of COVID-19  
137 among Italian regions. COVID-19 related independent variables were: 1) being under quarantine  
138 either because infected or in close proximity to infected people; 2) any changes in working  
139 activity compared to “working as usual” (e.g., smart-working, working activity discontinued due  
140 to lockdown measures, higher workload due to COVID-19); 3) having a loved one infected,  
141 hospitalized or deceased due to COVID-19; 4) any stressful events comprised in the IDAQ  
142 checklist, purposely modified in order to capture only stressful events due to COVID-19. The  
143 IADQ checklist comprises 8 questions about any potential stressful life event occurred in the  
144 recent past, with a yes/no response, including financial, working, educational, housing,  
145 relationship, own or loved one’s health and caregiving problems. In order to separate COVID-19  
146 related stressful life events from non-COVID-19 related events, responses to the checklist were  
147 modified as follows: “no”; “yes”; “yes, due to COVID-19”. Responses were collapsed in a binary  
148 variable where 1=“any stressful life event only if due to COVID-19” and 0=“no stressful life events  
149 or presence of a stressful life event not due to COVID-19”.

150

### 151 *Confounders*

152 A history of childhood trauma and any previous mental illness, as assessed by the dedicated GPS  
153 module; education level, occupation (employed, unemployed, student, retired) and being in a  
154 relationship.

155

### 156 *Statistical Analysis*

157 Frequency analysis were performed in order to ascertain the prevalence of each outcome,  
158 separately for Northern, Central and Southern Italy.

159 A seemingly-unrelated multivariate logistic regression model was fitted in order to explore the  
160 impact of the proposed covariates and confounders on the selected outcomes. Seemingly unrelated  
161 regression models are systems of equations that allow to jointly model several outcomes,  
162 assuming correlation among their errors. Because of the very low missing data rates (<3%),  
163 missing data were treated with listwise deletion in regression analysis.

164 Data analysis was performed using Stata v. 16<sup>®</sup> (StataCorp). Seemingly unrelated logistic  
165 regression was performed using the `-suest-` postestimation command after running a panel of  
166 logistic regressions.

167

## 168 **Results**

169 Socio-demographic characteristics of the sample, along with rates of mental health outcomes, are  
170 reported in Table 1. Of the 18147 respondents, 6666 (37.14%) reported  $\geq 3/5$  PTSS, with a median  
171 total GPS symptom score of 7 (IQR=6, range 0-17); 3099 respondents (17.3%) reported severe  
172 depressive symptoms, with a PHQ total median score of 8 (IQR=6, range 0-17); 3732 (20.8%)  
173 respondents reported severe anxiety symptoms, with GAD median score of 8 (range 0-21,  
174 IQR=10); 1306 (7.3%) respondents reported severe insomnia symptoms, with ISI median total  
175 score of 10 (range 0-28, IQR=12); PSS total score median was 25 (range 4-44, IQR=13), 75<sup>th</sup>  
176 percentile was 31, with 3933 (21.9%) respondents scoring above this threshold; 4129 (23.0%)  
177 respondents reported a IADQ scoring compatible with the suspect of a presence of an adjustment  
178 disorder.

179 Seemingly unrelated logistic regression analyses are reported in Table 2. Being a woman was  
180 associated with all of the selected outcomes (PTSS: OR=2.12 [1.94, 2.31]; depression: OR=1.39  
181 [1.24, 1.56]; anxiety: OR=1.77 [1.59, 1.97]; perceived stress: OR=2.06 [1.85, 2.30]; insomnia:  
182 OR=1.50 [1.26, 1.78]; adjustment disorder: OR=1.64 [1.45, 1.84]). Younger age was associated  
183 with PTSS, depression, anxiety and perceived stress (respectively: OR=1.49 [1.39, 1.60]; 1.55  
184 [1.42, 1.69]; 1.72 [1.59, 1.87]; 1.76 [1.62, 1.90]). Compared to Northern Italy, participants from  
185 Southern Italy showed higher odds of all of the selected outcomes, except for ADS (PTSS:  
186 OR=1.36 [1.26, 1.47]; depression: OR=1.25 [1.13, 1.37]; anxiety: OR=1.29 [1.18, 1.41];  
187 perceived stress: OR=1.20 [1.10, 1.32]; insomnia: OR=1.41 [1.24, 1.62]). Being under quarantine  
188 because infected or in close proximity to infected people was associated with PTSS, Anxiety and  
189 ADS (respectively: OR=1.74 [1.21,2.49]; 1.52 [1.05,2.22]; 2.28 [1.44,3.61]). Having experienced  
190 a stressful life event due to COVID-19, as assessed by the modified IADQ checklist, was  
191 associated with all of the selected outcomes (PTSS: OR=1.46 [1.37,1.56]; depression: OR=1.58  
192 [1.45,1.72]; anxiety: OR=1.64 [1.51,1.78]; perceived stress: OR=1.82 [1.68,1.97]; insomnia:  
193 OR=1.58 [1.40,1.79]). OR of IADQ-Checklist on ADS was not estimated due to the perfect  
194 prediction, because having an IADQ checklist event is a prerequisite for having a suspected  
195 Adjustment Disorder. Working activity discontinued due to COVID-19 was associated with all of  
196 the selected outcomes except for ADS (PTSS: OR=1.15 [1.05,1.27]; depression: OR=1.40  
197 [1.23,1.59]; anxiety: OR=1.16 [1.03,1.31]; perceived stress: OR=1.19 [1.06,1.34]; insomnia:  
198 OR=1.22 [1.03,1.46]), while working more than usual due to the COVID-19 was associated with  
199 PTSS, perceived stress and ADS (respectively: OR= 1.42 [1.18,1.71]; 1.71 [1.38,2.12]; 1.39  
200 [1.04,1.87]). Having a loved one deceased by COVID-19 was associated with PTSS (OR=1.68  
201 [1.30,2.16]), depression (OR=1.41 [1.03,1.93]), perceived stress (OR=1.34 [1.01, 1.78]), insomnia  
202 (OR=1.74 [1.18, 2.54]), while having a loved one diagnosed with COVID-19 was associated with  
203 PTSS (OR=1.22 [1.05, 1.42]).

204

## 205 **Discussion**

206 In this study, we report for the first time on the mental health outcomes related to COVID-19  
207 outbreak and related lockdown measures on the general population in Italy. To the best of our  
208 knowledge, this is the first study to report on mental health outcomes related to the COVID-19  
209 outbreak in Europe on such a large sample size. This study shows relatively high rates of PTSS,  
210 Depression, Anxiety, Insomnia, Perceived stress and ADS, with young women having higher odds  
211 of endorsing a mental health outcome. These outcomes were associated with a number of COVID-  
212 19-related risk factors, including being under quarantine, having a loved one deceased by COVID-  
213 19, working activity discontinued due to lockdown measures, or experiencing other stressful  
214 events (i.e. working, financial, relationship or housing problems) due to the pandemic or  
215 lockdown measures. These findings were adjusted for previous psychiatric illness and a history of  
216 childhood trauma, suggesting that the COVID-19 pandemic is exerting an independent effect on  
217 the population mental health.

218

### 219 *Previous literature*

220 Compared to an early report on the mental health outcomes related to COVID-19 in China on  
221 1210 respondents (Wang et al., 2020), we found lower rates of anxiety, similar rates of depression  
222 and higher levels of perceived stress, notwithstanding differences in assessment tools. The  
223 negative association with age and the positive association with female gender was confirmed,  
224 suggesting that young women may be at heightened risk for mental disorders. Compared to  
225 another large web-based survey from China on 52730 respondents that evaluated peritraumatic

226 stress-related symptoms, we found similar rates of PTSS (Qiu et al., 2020). Another study on 285  
227 participants from hardest-hit Hubei province found substantially lower rates of PTSS, around 7%  
228 (Liu et al., 2020). Such disparities could be due to different assessment tools used and differences  
229 in sample size. A study on 7143 medical students in China (Cao et al., 2020) found severe anxiety  
230 rates, assessed as  $GAD \geq 15$ , to be 0.9%, compared to our 20.9%. This inconsistency could be due  
231 to the particular population investigated, having a high education level. Indeed, higher education  
232 was associated with better outcomes in our study. Furthermore, cultural, social and health care  
233 system differences between China and Italy could explain differences in reported mental health  
234 outcomes.

235 Coherently with previous reports from China, female gender (Liu et al., 2020; Qiu et al., 2020;  
236 Wang et al., 2020) and younger age (Qiu et al., 2020; Wang et al., 2020) were consistently  
237 associated with higher risk for different mental health outcomes. If confirmed in other populations  
238 worldwide, these findings could be of great importance for subsequent intervention strategy for  
239 global mental health related to COVID-19.

#### 240 *Relevance*

241 Monitoring populations' mental health is critical during a pandemic, as generalized fear and fear-  
242 induced over-reactive behaviour among the public could impede infection control (Dong and  
243 Bouey, 2020). Further, the current strict lockdown measures and the home confinement of  
244 unknown duration represent an unprecedented stressful event potentially leading to significant  
245 long-term health costs. Epidemiological monitoring and targeted intervention should be therefore  
246 timely implemented to prevent further mental health problems. Indeed, once the outbreak will be  
247 over, its negative socio-economic consequences may have a detrimental effect on the population's  
248 mental health, as suggested by our finding of an heightened risk of mental health issues due to  
249 COVID-19 related working difficulties and by earlier studies related to the last economic crisis  
250 (Wahlbeck et al., 2011).

251

#### 252 *Limitations and future directions*

253 This study has some important limitations due to the sampling technique. Relying on social  
254 networks voluntary recruitment and re-sharing could have introduced an important selection bias,  
255 firstly excluding people not on social networks, and secondly introducing a self-selection bias, as  
256 suggested by the highly unbalanced gender ratio observed. This latter bias could have affected  
257 also two other large web-based surveys in China, that reported on samples with a 64.7% and  
258 67.3% proportion of woman (Qiu et al., 2020; Wang et al., 2020). For these reasons, rates of  
259 mental health outcomes should be interpreted with caution. Secondly, this survey was based on  
260 self-report instruments that could introduce a systematic bias and return different rates compared  
261 to interview-based measures.

262 This study has also several strengths, including a very large sample size and the sampling  
263 timeframe that corresponded to the pandemic peak in Italy.

264 Future studies will need to monitor the trajectory of mental health outcomes, in order to define  
265 mental health interventions at a population level.

266

#### 267 **Conclusions**

268 We found high rates of negative mental health outcomes in the Italian general population three to  
269 four weeks into the COVID-19 pandemic and lockdown measures. COVID-19 related factors  
270 were associated with these outcomes independently from previous mental illness or childhood  
271 trauma. These findings warrant further monitoring on the Italian population's mental health and  
272 could serve to inform structured interventions in order to mitigate the impact on mental health of  
273 the outbreak.

274

#### 275 **Authors contribution**

276 Conceptualization: RR, VS, FP, GDL; Methodology: RR; Formal Analysis: RR; Data Curation:  
277 RR, SM, GDL; Writing - Original Draft: RR, VS; Writing - Review & Editing: RR, VS, DT,  
278 ADM, FP, SM, CN, AR, AS, GDL.

#### 279 **Funding**

280 No specific funding was granted for this study.

#### 281 **Acknowledgments**

282 This work is supported by Territori Aperti, a project founded by "Fondo Territori Lavoro e  
283 Conoscenza CGIL CISL UIL".

#### 284 **Conflicts of interests**

285 The authors have no conflict of interest to disclose.

#### 286 **Contribution to the field**

287 The COronaVirus Disease 2019 (COVID-19) pandemic is a global health emergency that could  
288 potentially have a serious impact on public health, including mental health. The psychological  
289 impact of the COVID-19 outbreak and related lockdown measures among the Italian population  
290 are unknown. In this web-based study, we report for the first time on the psychological impact of  
291 COVID-19 outbreak on the general population in Italy. This study shows high rates of post-  
292 traumatic symptoms, Depression, Anxiety, Insomnia, Perceived stress and Adjustment Disorder  
293 associated with a number of COVID-19-related risk factors. This study represents the first  
294 European report on mental health in the time of the COVID-19, and it could have a strong impact  
295 on subsequent research and clinical intervention strategy for global mental health related to  
296 COVID-19.

297



298

299 **BIBLIOGRAPHY**

- 300 Bai, Y. M., Lin, C. C., Lin, C. Y., Chen, J. Y., Chue, C. M., and Chou, P. (2004). Survey of stress reactions among  
301 health care workers involved with the SARS outbreak. *Psychiatr. Serv.* 55, 1055–1057.  
302 doi:10.1176/appi.ps.55.9.1055.
- 303 Brooks, S. K., Webster, R. K., Smith, L. E., Woodland, L., Wessely, S., Greenberg, N., et al. (2020). The  
304 psychological impact of quarantine and how to reduce it: rapid review of the evidence. *Lancet* 395, 912–920.  
305 doi:10.1016/s0140-6736(20)30460-8.
- 306 Cao, W., Fang, Z., Hou, G., Han, M., Xu, X., Dong, J., et al. (2020). The psychological impact of the COVID-19  
307 epidemic on college students in China. *Psychiatry Res.*, 112934. doi:10.1016/j.psychres.2020.112934.
- 308 Cohen, S., and Hoberman, H. M. (1983). Positive Events and Social Supports as Buffers of Life Change Stress1. *J.*  
309 *Appl. Soc. Psychol.* 13, 99–125. doi:10.1111/j.1559-1816.1983.tb02325.x.
- 310 DiGiovanni, C., Conley, J., Chiu, D., and Zaborski, J. (2004). Factors influencing compliance with quarantine in  
311 Toronto during the 2003 SARS outbreak. *Biosecur. Bioterror.* 2, 265–272. doi:10.1089/bsp.2004.2.265.
- 312 Dong, L., and Bouey, J. (2020). Public Mental Health Crisis during COVID-19 Pandemic, China. *Emerg. Infect. Dis.*  
313 26. doi:10.3201/eid2607.202407.
- 314 Hawryluck, L., Gold, W. L., Robinson, S., Pogorski, S., Galea, S., and Styra, R. (2004). SARS control and  
315 psychological effects of quarantine, Toronto, Canada. *Emerg. Infect. Dis.* 10, 1206–1212.  
316 doi:10.3201/eid1007.030703.
- 317 Lai, J., Ma, S., Wang, Y., Cai, Z., Hu, J., Wei, N., et al. (2020). Factors Associated With Mental Health Outcomes  
318 Among Health Care Workers Exposed to Coronavirus Disease 2019. *JAMA Netw. open* 3, e203976.  
319 doi:10.1001/jamanetworkopen.2020.3976.
- 320 Lee, S., Chan, L. Y. Y., Chau, A. M. Y., Kwok, K. P. S., and Kleinman, A. (2005). The experience of SARS-related  
321 stigma at Amoy Gardens. *Soc. Sci. Med.* 61, 2038–2046. doi:10.1016/j.socscimed.2005.04.010.
- 322 Liu, N., Zhang, F., Wei, C., Jia, Y., Shang, Z., Sun, L., et al. (2020). Prevalence and predictors of PTSS during  
323 COVID-19 Outbreak in China Hardest-hit Areas: Gender differences matter. *Psychiatry Res.*, 112921.  
324 doi:10.1016/j.psychres.2020.112921.
- 325 Morin, C. M., Belleville, G., Bélanger, L., and Ivers, H. (2011). The Insomnia Severity Index: Psychometric  
326 Indicators to Detect Insomnia Cases and Evaluate Treatment Response. *Sleep* 34, 601–608.  
327 doi:10.1093/sleep/34.5.601.
- 328 Olf, M., Aakvaag, H. F., Brewer, D., Elmore Borbon, D. L., Hyland, P., Kassam-Adams, N., et al. Screening for  
329 consequences of trauma – an update on the Global Collaboration on Traumatic Stress. *In press. Eur. J.*  
330 *Psychotraumatol.* 11.
- 331 Qiu, J., Shen, B., Zhao, M., Wang, Z., Xie, B., and Xu, Y. (2020). A nationwide survey of psychological distress  
332 among Chinese people in the COVID-19 epidemic: Implications and policy recommendations. *Gen. Psychiatry*  
333 33, 19–21. doi:10.1136/gpsych-2020-100213.
- 334 Shevlin, M., Hyland, P., Ben-Ezra, M., Karatzias, T., Cloitre, M., Vallières, F., et al. (2020). Measuring ICD-11  
335 adjustment disorder: the development and initial validation of the International Adjustment Disorder  
336 Questionnaire. *Acta Psychiatr. Scand.* doi:10.1111/acps.13126.
- 337 Spitzer, R. L., Kroenke, K., Williams, J. B. W., and Löwe, B. (2006). A Brief Measure for Assessing Generalized  
338 Anxiety Disorder. *Arch. Intern. Med.* 166, 1092. doi:10.1001/archinte.166.10.1092.
- 339 Spitzer, R. L., Kroenke, K., and Williams, J. B. (1999). Validation and Utility of a Self-Report Version of PRIME-MD:  
340 The PHQ Primary Care Study. Primary Care Evaluation of Mental Disorders. Patient Health Questionnaire.  
341 *JAMA* 282, 1737. doi:10.1001/jama.282.18.1737.

- 342 Tucci, V., Moukaddam, N., Meadows, J., Shah, S., Galwankar, S. C., and Bobby Kapur, G. (2017). The forgotten  
343 plague: Psychiatric manifestations of ebola, zika, and emerging infectious diseases. *J. Glob. Infect. Dis.* 9, 151–  
344 156. doi:10.4103/jgid.jgid\_66\_17.
- 345 Wahlbeck, K., Anderson, P., Basu, S., McDaid, D., and Stuckler, D. (2011). Impact of economic crises on mental  
346 health. *World Health.*
- 347 Wang, C., Pan, R., Wan, X., Tan, Y., Xu, L., Ho, C. S., et al. (2020). Immediate Psychological Responses and  
348 Associated Factors during the Initial Stage of the 2019 Coronavirus Disease (COVID-19) Epidemic among the  
349 General Population in China. *Int J Env. Res Public Heal.* 17. doi:10.3390/ijerph17051729.
- 350 World Health Organization (2020a). Mental Health and Psychosocial Considerations During COVID-19 Outbreak.
- 351 World Health Organization (2020b). World Health Organization - COVID-19. Available at: <https://who.sprinklr.com/>.
- 352 Wu, P., Fang, Y., Guan, Z., Fan, B., Kong, J., Yao, Z., et al. (2009). The psychological impact of the SARS epidemic  
353 on hospital employees in China: Exposure, risk perception, and altruistic acceptance of risk. *Can. J. Psychiatry*  
354 54, 302–311. doi:10.1177/070674370905400504.
- 355 Xiang, Y.-T., Yang, Y., Li, W., Zhang, L., Zhang, Q., Cheung, T., et al. (2020). Timely mental health care for the  
356 2019 novel coronavirus outbreak is urgently needed. *The Lancet Psychiatry* 7, 228–229. doi:10.1016/S2215-  
357 0366(20)30046-8.
- 358
- 359

360

361 **Table 1. Demographic characteristics and rates of mental health outcomes in the sample**

|                                | Total                  | North                  | Centre                 | South                  |
|--------------------------------|------------------------|------------------------|------------------------|------------------------|
|                                | No. / Median (% / IQR) | No. / Median (% / IQR) | No. / Median (% / IQR) | No. / Median (% / IQR) |
| <b>Age</b>                     | 38 (23)                | 38 (23)                | 38 (24)                | 38 (31)                |
| <b>Gender</b>                  |                        |                        |                        |                        |
| <i>Women</i>                   | 14207 (79.5)           | 6310 (79)              | 3729 (79.4)            | 4168 (80.6)            |
| <i>Men</i>                     | 3653 (20.5)            | 1681 (21)              | 966 (20.6)             | 1006 (19.4)            |
| <b>Education</b>               |                        |                        |                        |                        |
| ≤ <i>Undergraduate</i>         | 8538 (47.8)            | 3770 (47.2)            | 2243 (47.8)            | 2525 (48.8)            |
| ≥ <i>Postgraduate</i>          | 7674 (43)              | 3411 (42.7)            | 2112 (45)              | 2151 (41.6)            |
| <i>Lower education</i>         | 1649 (9.2)             | 810 (10.1)             | 340 (7.2)              | 499 (9.6)              |
| <b>Occupation</b>              |                        |                        |                        |                        |
| <i>Housewife</i>               | 1139 (6.4)             | 367 (4.6)              | 244 (5.2)              | 528 (10.2)             |
| <i>Unemployed</i>              | 2094 (11.7)            | 793 (9.9)              | 484 (10.3)             | 817 (15.8)             |
| <i>Employed</i>                | 10881 (60.9)           | 5349 (66.9)            | 2867 (61.1)            | 2665 (51.5)            |
| <i>Retired</i>                 | 291 (1.6)              | 124 (1.6)              | 77 (1.6)               | 90 (1.7)               |
| <i>Student</i>                 | 3456 (19.3)            | 1358 (17)              | 1023 (21.8)            | 1075 (20.8)            |
| <b>Currently on Quarantine</b> | 141 (0.8)              | 101 (1.3)              | 21 (0.5)               | 19 (0.4)               |
| <b>Working activity change</b> |                        |                        |                        |                        |
| <i>As usual</i>                | 2320 (13.5)            | 977 (12.6)             | 633 (14)               | 710 (14.5)             |
| <i>Smart-working</i>           | 6688 (38.9)            | 3088 (39.9)            | 1847 (40.9)            | 1753 (35.7)            |
| <i>Discontinued</i>            | 7500 (43.7)            | 3347 (43.2)            | 1870 (41.4)            | 2283 (46.5)            |
| <i>More than usual</i>         | 665 (3.9)              | 335 (4.3)              | 168 (3.7)              | 162 (3.3)              |
| <b>Loved one's status</b>      |                        |                        |                        |                        |
| <i>None</i>                    | 16312 (91.8)           | 6987 (87.6)            | 4431 (94.7)            | 4894 (95.5)            |
| <i>Infected</i>                | 789 (4.4)              | 519 (6.5)              | 139 (3)                | 131 (2.6)              |
| <i>Deceased</i>                | 253 (1.4)              | 183 (2.3)              | 30 (0.6)               | 40 (0.8)               |
| <i>Hospitalized</i>            | 424 (2.4)              | 284 (3.6)              | 80 (1.7)               | 60 (1.2)               |
| <b>GPS PTSS≥3</b>              | 6604 (37)              | 2876 (36)              | 1560 (33.2)            | 2168 (41.9)            |
| <b>PHQ ≥15</b>                 | 3084 (17.3)            | 1349 (16.9)            | 703 (15)               | 1032 (20)              |
| <b>GAD ≥15</b>                 | 3700 (20.8)            | 1613 (20.2)            | 854 (18.3)             | 1233 (23.9)            |
| <b>ISI ≥22</b>                 | 1301 (7.3)             | 542 (6.8)              | 280 (6)                | 479 (9.3)              |
| <b>PSS 75th percentile</b>     | 3895 (21.8)            | 1720 (21.5)            | 918 (19.6)             | 1257 (24.3)            |
| <b>ADS</b>                     | 4092 (22.9)            | 1900 (23.8)            | 1032 (22)              | 1160 (22.4)            |

362  
363

GPS: Global Psychotrauma Screen; PHQ: Patient Health Questionnaire; GAD: Generalized Anxiety Disorder scale; ISI: Insomnia severity Index; PSS: Perceived Stress Scale; ADS: Adjustment Disorder Symptom; IQR: Interquartile range.

364

**Table 2: Seemingly Unrelated Logistic Regression**

|                                         | <b>PTSS</b><br><i>OR [95%CI]</i> | <b>Depression</b><br><i>OR [95%CI]</i> | <b>Anxiety</b><br><i>OR [95%CI]</i> | <b>Perceived Stress</b><br><i>OR [95%CI]</i> | <b>Insomnia</b><br><i>OR [95%CI]</i> | <b>ADS</b><br><i>OR [95%CI]</i> |
|-----------------------------------------|----------------------------------|----------------------------------------|-------------------------------------|----------------------------------------------|--------------------------------------|---------------------------------|
| <b>Age</b> <sup>§</sup>                 | 1.49*** [1.39,1.60]              | 1.55*** [1.42,1.69]                    | 1.72*** [1.59,1.87]                 | 1.76*** [1.62,1.90]                          | 1.01 [0.97,1.05]                     | 1.05 [0.75,1.47]                |
| <b>Gender</b>                           |                                  |                                        |                                     |                                              |                                      |                                 |
| <i>Men</i>                              | 1.00 (ref)                       |                                        |                                     |                                              |                                      |                                 |
| <i>Women</i>                            | 2.12*** [1.94,2.31]              | 1.39*** [1.24,1.56]                    | 1.77*** [1.59,1.97]                 | 2.06*** [1.85,2.30]                          | 1.50*** [1.26,1.78]                  | 1.64*** [1.45,1.84]             |
| <b>Region</b>                           |                                  |                                        |                                     |                                              |                                      |                                 |
| <i>North</i>                            | 1.00 (ref)                       |                                        |                                     |                                              |                                      |                                 |
| <i>Centre</i>                           | 0.93 [0.86,1.01]                 | 0.87* [0.78,0.97]                      | 0.90* [0.82,1.00]                   | 0.90* [0.82,0.99]                            | 0.9 [0.77,1.05]                      | 0.91 [0.81,1.02]                |
| <i>South</i>                            | 1.36*** [1.26,1.47]              | 1.25*** [1.13,1.37]                    | 1.29*** [1.18,1.41]                 | 1.20*** [1.10,1.32]                          | 1.41*** [1.24,1.62]                  | 0.95 [0.85,1.06]                |
| <b>COVID-19-Related Stressful Event</b> | 1.46*** [1.37,1.56]              | 1.58*** [1.45,1.72]                    | 1.64*** [1.51,1.78]                 | 1.82*** [1.68,1.97]                          | 1.58*** [1.40,1.79]                  | n.a. n.a.                       |
| <b>Currently On Quarantine</b>          | 1.74** [1.21,2.49]               | 1.49 [0.98,2.26]                       | 1.52* [1.05,2.22]                   | 1.42 [0.97,2.07]                             | 1.23 [0.69,2.18]                     | 2.28*** [1.44,3.61]             |
| <b>Working Activity Change</b>          |                                  |                                        |                                     |                                              |                                      |                                 |
| <i>As Usual</i>                         | 1.00 (ref)                       |                                        |                                     |                                              |                                      |                                 |
| <i>Smart-Working</i>                    | 1.01 [0.91,1.12]                 | 0.99 [0.86,1.14]                       | 0.97 [0.85,1.10]                    | 1.02 [0.90,1.15]                             | 0.9 [0.74,1.10]                      | 1.07 [0.91,1.25]                |
| <i>Discontinued</i>                     | 1.15** [1.05,1.27]               | 1.40*** [1.23,1.59]                    | 1.16* [1.03,1.31]                   | 1.19** [1.06,1.34]                           | 1.22* [1.03,1.46]                    | 1.1 [0.95,1.28]                 |
| <i>More Than Usual</i>                  | 1.42*** [1.18,1.71]              | 1.26 [0.98,1.63]                       | 1.25 [1.00,1.57]                    | 1.71*** [1.38,2.12]                          | 1.29 [0.93,1.80]                     | 1.39* [1.04,1.87]               |
| <b>Loved One's Condition</b>            |                                  |                                        |                                     |                                              |                                      |                                 |
| <i>None</i>                             | 1.00 (ref)                       |                                        |                                     |                                              |                                      |                                 |
| <i>Infected</i>                         | 1.22* [1.05,1.42]                | 1.05 [0.87,1.28]                       | 0.91 [0.75,1.10]                    | 0.88 [0.73,1.05]                             | 1.02 [0.77,1.35]                     | 0.96 [0.79,1.17]                |
| <i>Deceased</i>                         | 1.68*** [1.30,2.16]              | 1.41* [1.03,1.93]                      | 1.22 [0.91,1.65]                    | 1.34* [1.01,1.78]                            | 1.74** [1.18,2.54]                   | 1.21 [0.87,1.68]                |
| <i>Hospitalized</i>                     | 1.22 [1.00,1.48]                 | 1.09 [0.84,1.41]                       | 1.25 [0.99,1.57]                    | 1.1 [0.87,1.39]                              | 1.1 [0.76,1.60]                      | 1.16 [0.91,1.49]                |
| <b>In A Relationship</b>                | 1.14*** [1.06,1.22]              | 0.92 [0.84,1.00]                       | 1.11* [1.02,1.22]                   | 1.11* [1.02,1.21]                            | 1.08 [0.94,1.23]                     | 1.07 [0.97,1.19]                |
| <b>Education</b>                        |                                  |                                        |                                     |                                              |                                      |                                 |
| ≥ <i>Postgraduate</i>                   | 1.00 (ref)                       |                                        |                                     |                                              |                                      |                                 |
| ≤ <i>Undergraduate</i>                  | 1.12** [1.04,1.20]               | 1.30*** [1.19,1.43]                    | 1.28*** [1.18,1.39]                 | 1.25*** [1.15,1.36]                          | 1.31*** [1.15,1.50]                  | 1.05 [0.95,1.16]                |
| <i>Lower Education</i>                  | 1.25*** [1.11,1.41]              | 1.62*** [1.40,1.87]                    | 1.51*** [1.32,1.74]                 | 1.47*** [1.28,1.69]                          | 1.76*** [1.46,2.13]                  | 1.21* [1.01,1.44]               |
| <b>Occupation</b>                       |                                  |                                        |                                     |                                              |                                      |                                 |
| <i>Employed</i>                         | 1.00 (ref)                       |                                        |                                     |                                              |                                      |                                 |
| <i>Housewife</i>                        | 1.28*** [1.11,1.47]              | 1.35** [1.12,1.63]                     | 1.31** [1.11,1.55]                  | 1.21* [1.03,1.44]                            | 1.39** [1.11,1.74]                   | 1.05 [0.83,1.32]                |
| <i>Unemployed</i>                       | 1.05 [0.94,1.17]                 | 1.59*** [1.40,1.80]                    | 1.39*** [1.23,1.57]                 | 1.22** [1.08,1.37]                           | 1.33** [1.12,1.58]                   | 1.09 [0.93,1.27]                |
| <i>Retired</i>                          | 0.9 [0.66,1.22]                  | 1.17 [0.79,1.75]                       | 1.02 [0.69,1.51]                    | 1.39 [0.96,2.01]                             | 0.88 [0.52,1.48]                     | 0.46* [0.22,0.97]               |
| <i>Student</i>                          | 0.79*** [0.71,0.88]              | 1.60*** [1.41,1.83]                    | 1.02 [0.90,1.16]                    | 1.28*** [1.13,1.44]                          | 1.02 [0.86,1.22]                     | 1.16 [0.84,1.62]                |
| <b>Childhood Trauma</b>                 | 1.06 [0.99,1.13]                 | 1.41*** [1.30,1.54]                    | 1.29*** [1.19,1.39]                 | 1.01 [0.93,1.09]                             | 1.50*** [1.33,1.70]                  | 1.10* [1.01,1.21]               |
| <b>Prior Psychiatric Diagnosis</b>      | 1.59*** [1.48,1.71]              | 2.19*** [2.01,2.39]                    | 2.10*** [1.94,2.28]                 | 1.73*** [1.59,1.87]                          | 1.76*** [1.56,1.98]                  | 1.25*** [1.13,1.39]             |

\*p<0.05; \*\*p<0.005; \*\*\*p<0.001; PTSS: Post-Traumatic Stress Symptoms; ADS: Adjustment Disorder Symptom; § Age is standardized and reversed, younger age has an OR>1 if associated with heightened risk.
